# Supplementary material for: Fabrication of Eco-Friendly Polyelectrolyte Membranes Based on Sulfonate Grafted Sodium Alginate for Drug Delivery, Toxic Metal Ion Removal and Fuel Cell Applications
Source: MDPI journal article supplement (doi:10.3390/polym13193293), 2021-09-27
Supplement: s1 [file s1]

# **Fabrication of Eco-friendly Polyelectrolyte Membranes for Drug Delivery, Toxic Metal Ion Removal and Fuel Cell Applications**

**R. Vijitha<sup>1</sup>, K. Nagaraja<sup>1</sup>, Marlia M. Hanafiah<sup>2,3</sup>, K. Madhusudana Rao<sup>4</sup>, Katta Venkateswarlu<sup>5</sup>, Sivarama Krishna Lakkaboyana<sup>6</sup>, K.S.V. Krishna Rao<sup>1\*</sup>**

<sup>1</sup>Polymer Biomaterial Design and Synthesis Laboratory, Department of Chemistry, Yogi Vemana University, Vemana Puram, Kadapa, Andhra Pradesh, India-516005; vijitha.ragaala@gmail.com (V.R.); nagarajakasula33@gmail.com (K.N.)

<sup>2</sup>Department of Earth Sciences and Environment, Faculty of Science and Technology, Universiti Kebangsaan Malaysia, Bangi 43600, Selangor, Malaysia; mhmarlia@ukm.edu.my

<sup>3</sup>Centre for Tropical Climate Change System, Institute of Climate Change, Universiti Kebangsaan Malaysia, Bangi 43600, Selangor, Malaysia

<sup>4</sup>School of Chemical Engineering, Yeungnam University, 280 Daehak-Ro, Gyeongsan, Gyeongbuk, 38541, South of Korea; msraochem@yu.ac.kr

<sup>5</sup>Laboratory for Synthetic & Natural Products Chemistry, Department of Chemistry, Yogi Vemana University, Vemana Puram, Kadapa, Andhra Pradesh, India-516005; kvenkat@yogivemanauniversity.ac.in

<sup>6</sup>Department of Chemical Technology, Chulalongkorn University, Pathumwan, Bangkok 10330, Thailand; svurams@gmail.com

Correspondence: ksvkr@yogivemanauniversity.ac.in; drksvkrishna@yvu.edu.in, Tel: +91 9704278890

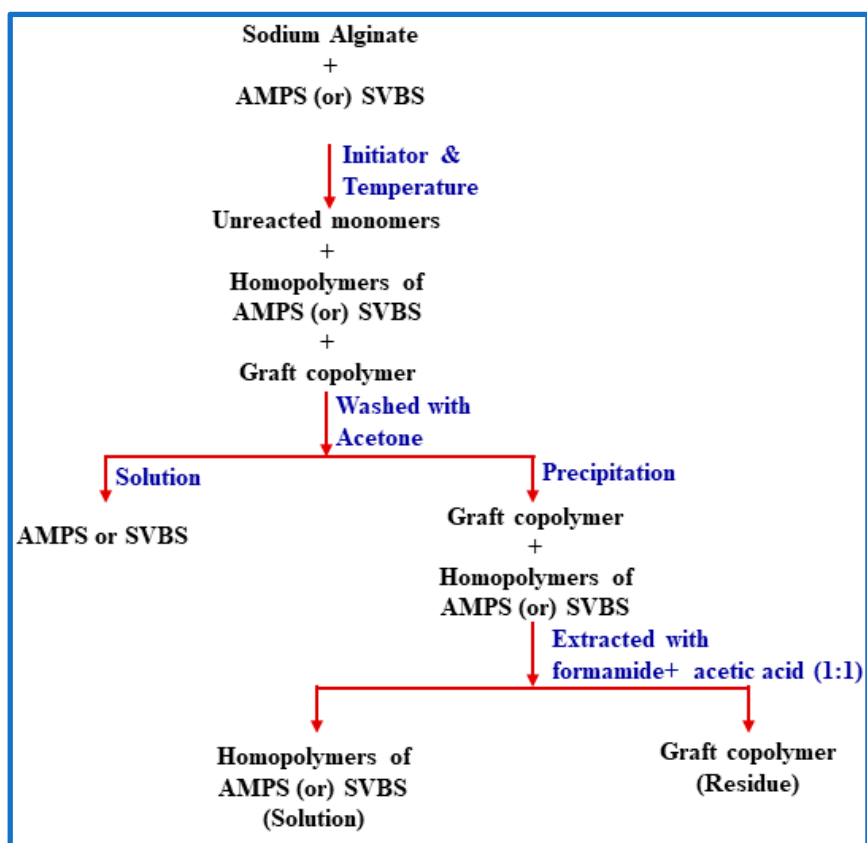

**Scheme S1:** Flow chart of sulfonate graft SA copolymers preparation and purification.

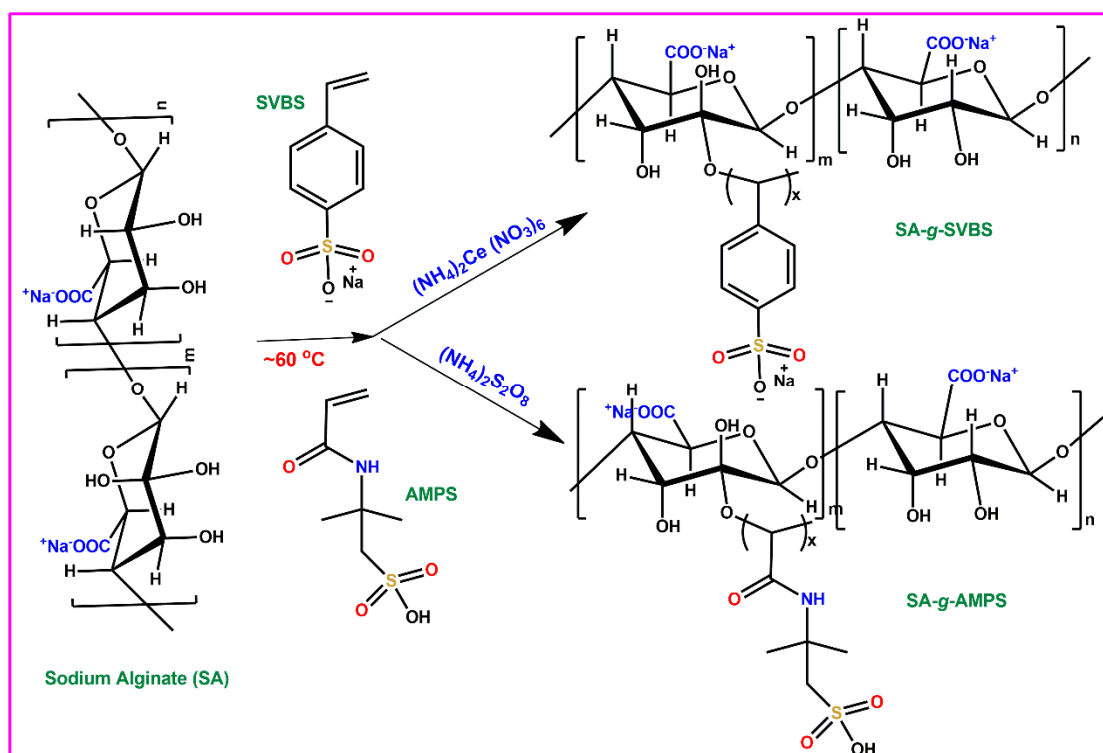

**Scheme S2:** Plausible schemactic chemistry of graft copolymerisation of AMPS and SBVS on to SA.

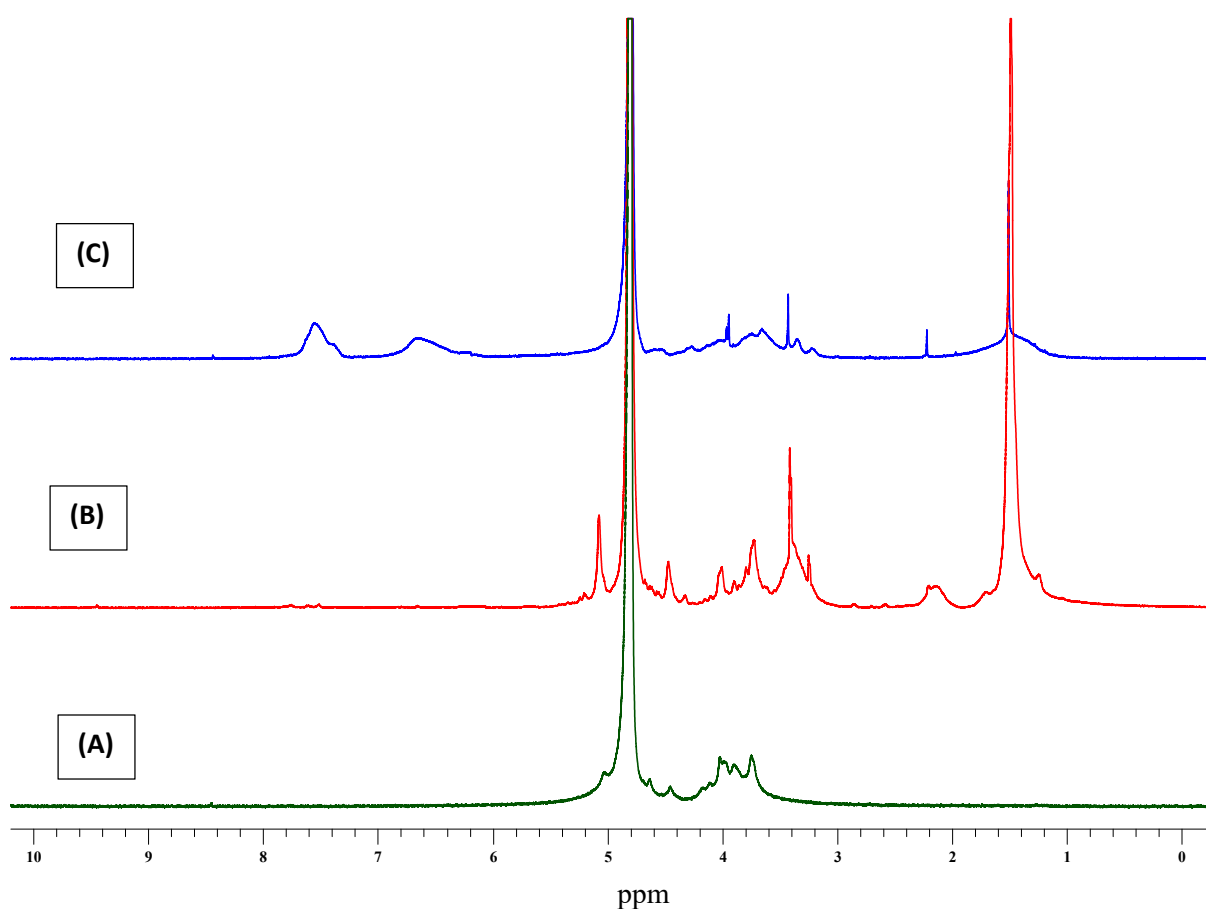

**Figure S 1:** NMR spectra of pure SA (A), SA-g-AMPS (B) and SA-g-SVBS (C).

### NMR Studies.

The  $^1\text{H}$  NMR spectrum of SA (in  $\text{D}_2\text{O}$ ) shows peaks at  $\delta = 5.28\text{--}4.57$  ppm, 4.45 ppm and 4.24–3.50 ppm. The presence of additional peaks at  $\delta = 3.53\text{--}3.13$  ppm, 2.29–1.96 ppm and 1.80–1.14 ppm along with the SA backbone peaks at  $\delta = 5.15\text{--}3.58$  ppm in the  $^1\text{H}$  NMR spectrum of SA-g-AMPS (in  $\text{D}_2\text{O}$ ) copolymer represents the AMPS incorporation on SA. Further, the formation of SA-g-SVBS has been confirmed by the presence of aromatic protons in its  $^1\text{H}$  NMR spectrum ( $\text{D}_2\text{O}$ ) at  $\delta = 7.72\text{--}7.27$  ppm and 6.89–6.26 ppm along with the SA backbone peaks at  $\delta = 5.10\text{--}3.13$  ppm.

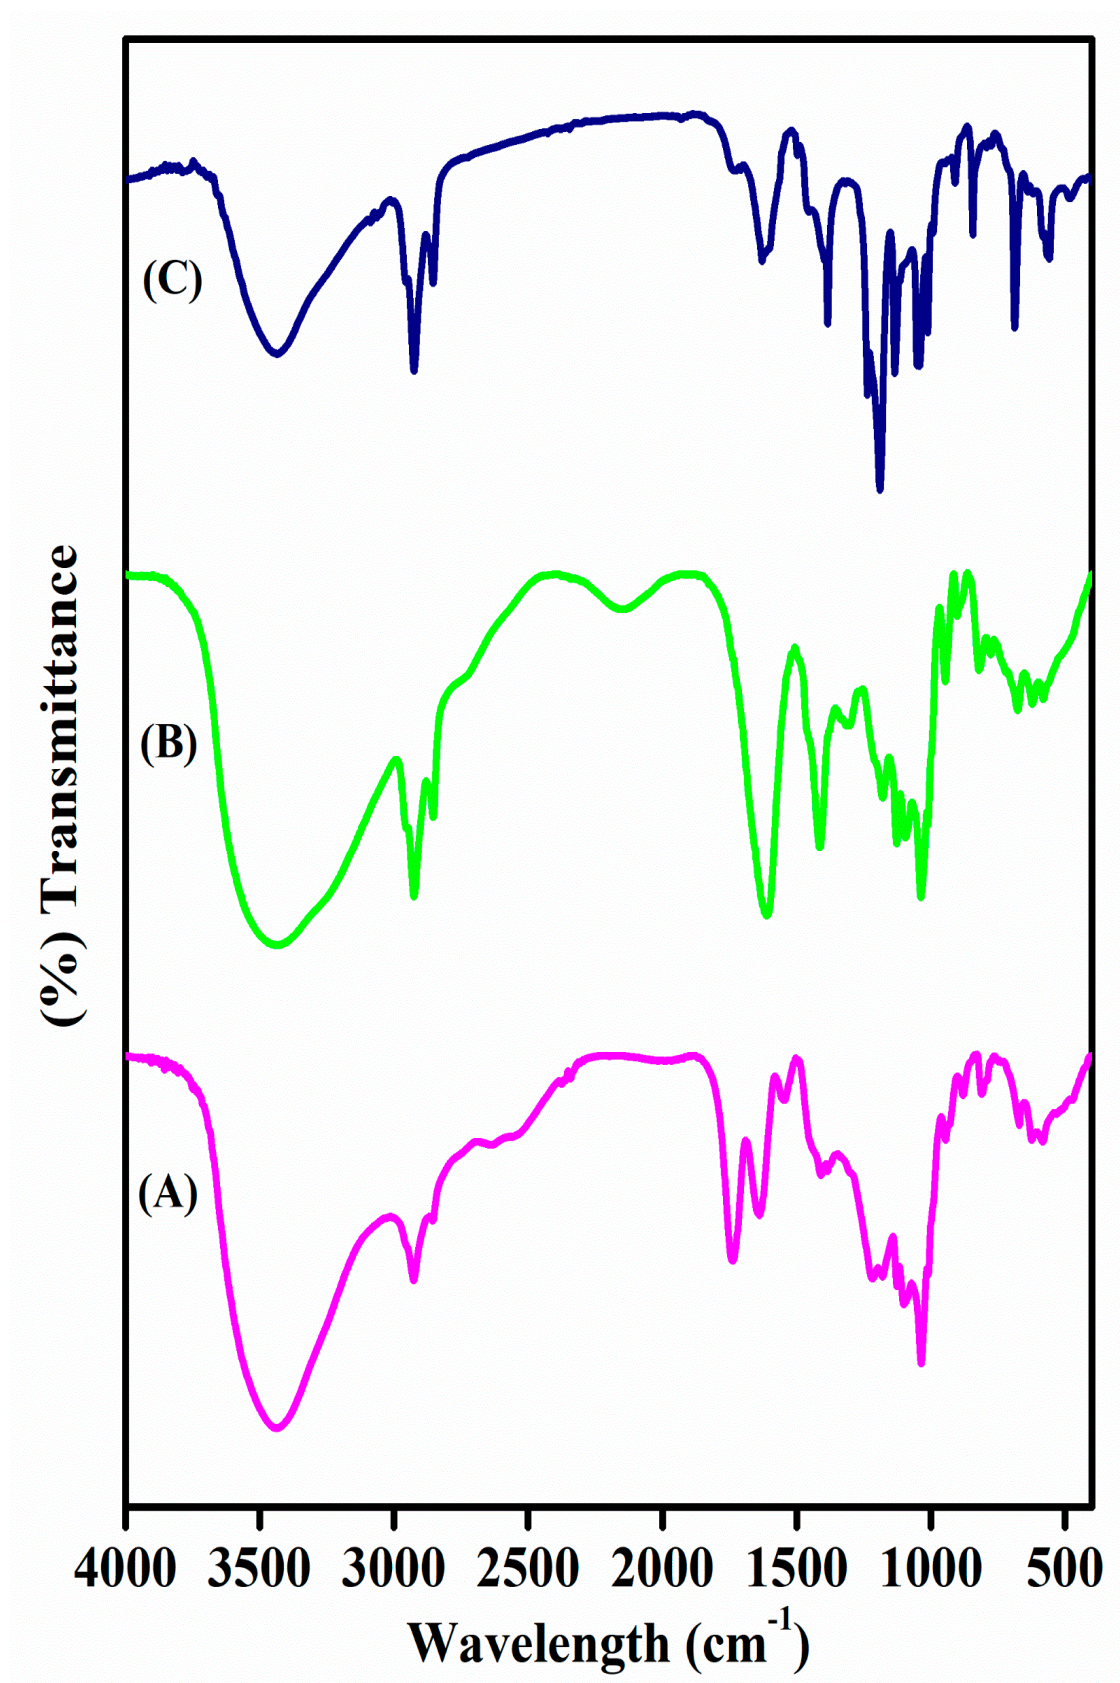

**Figure S2:** FTIR spectrum of pure SA (A), SA-g-AMPS (B) and SA-g-SVBS (C).

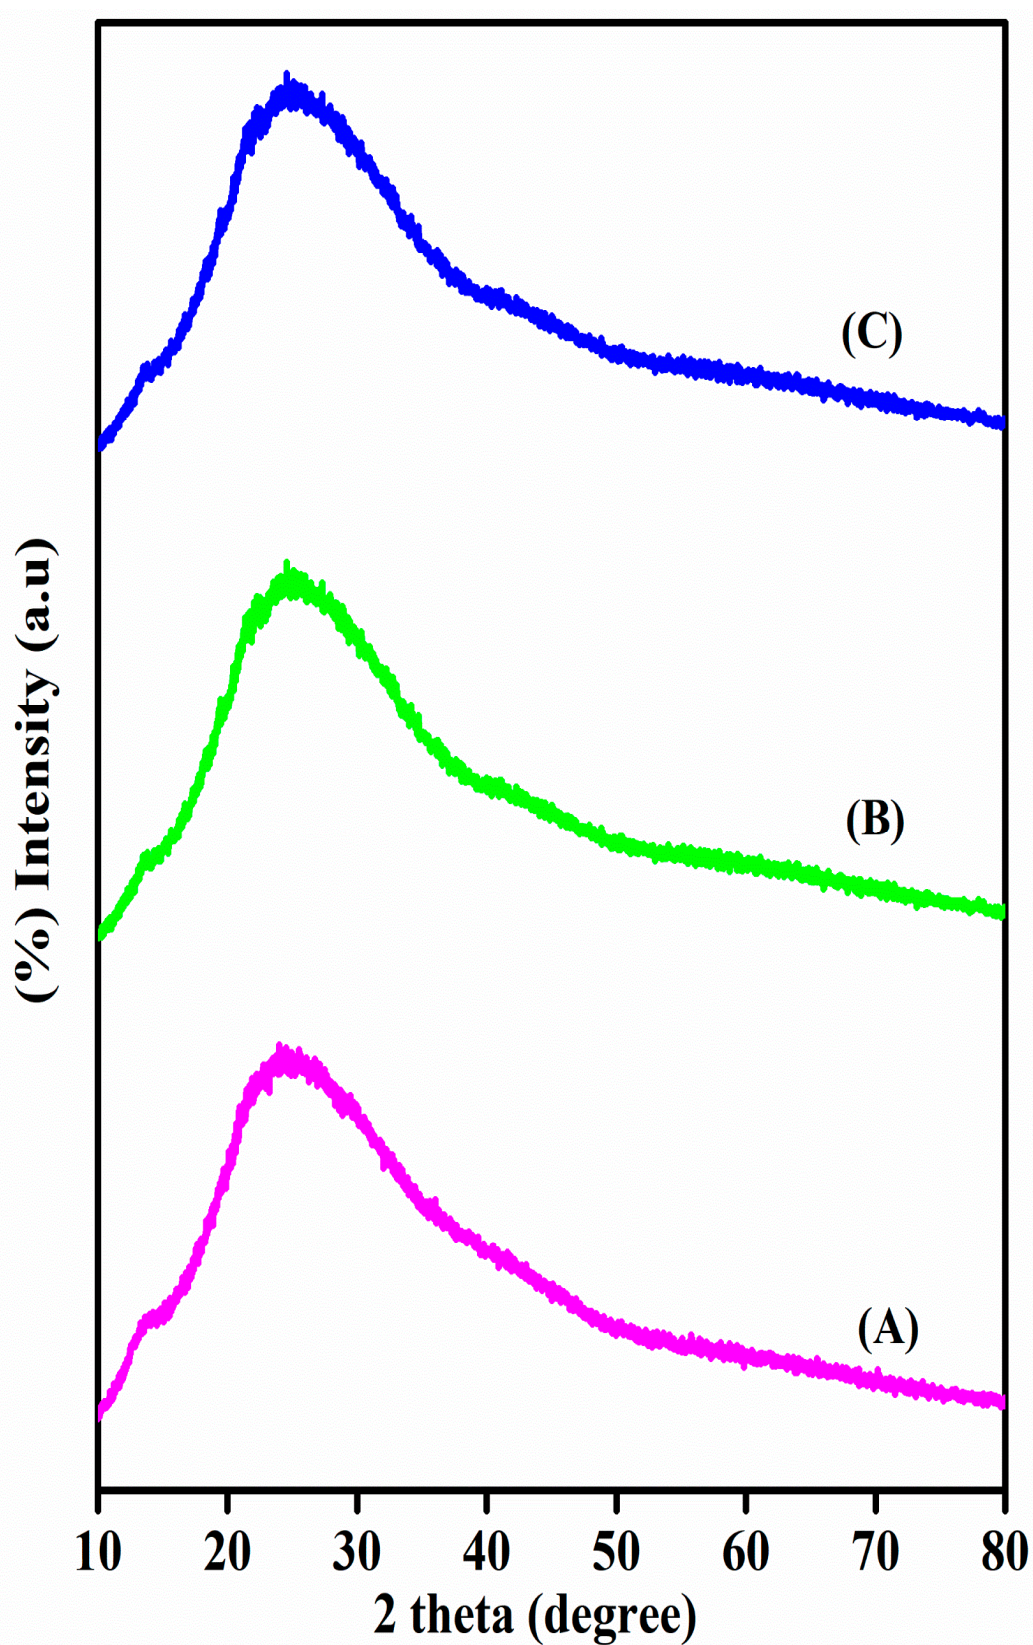

**Figure S3:** XRD patterns of pure SA (A), SA-g-AMPS (B) and SA-g-SVBS (C).

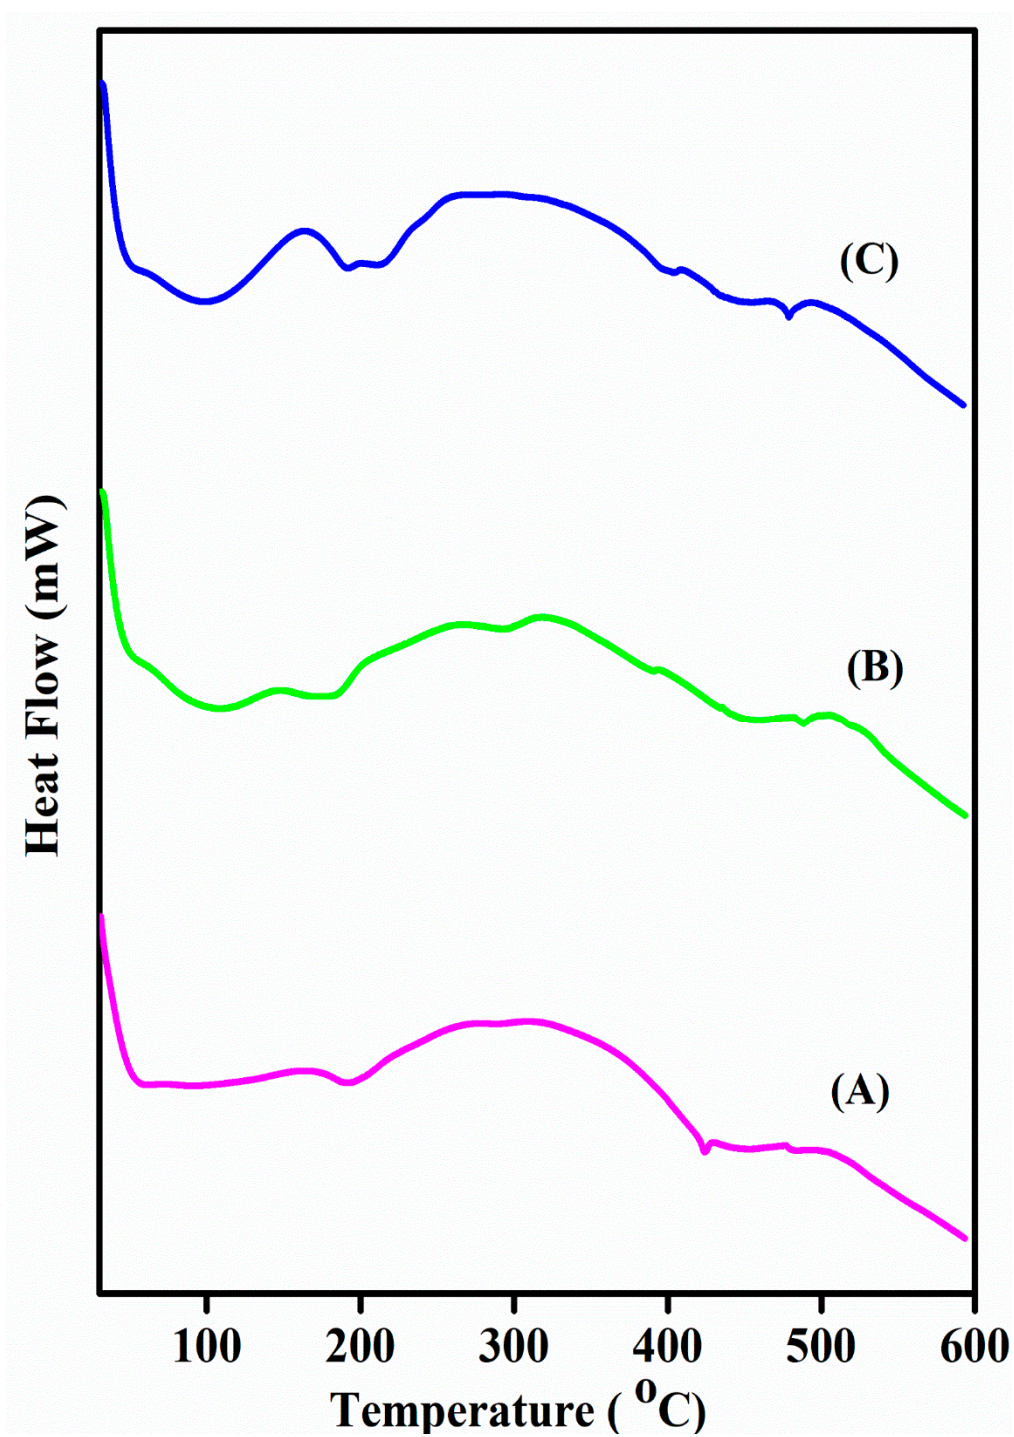

**Figure S4:** DSC of pure SA (A), SA-g-AMPS (B) and SA-g-SVBS (C).

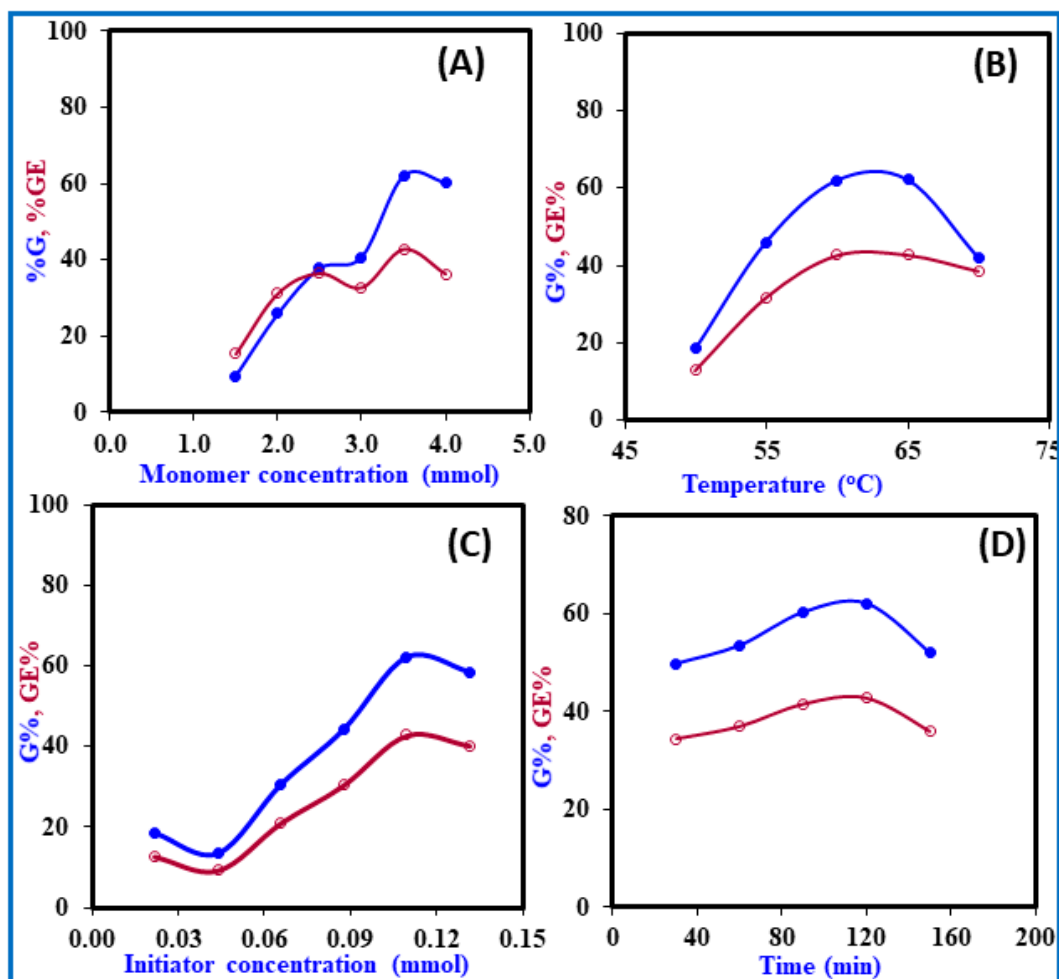

**Figure S5:** Effect of various reaction conditions on the grafting of AMPS onto the SA, prepared by APS as initiator. **(A)** Effect of monomer concentration [Other reaction conditions: 0.5 g of SA temperature: 60 °C; time: 120 min; initiator concentration 0.09mol.]. **(B)** Effect of reaction temperature [Other reaction conditions: 0.5 g of SA; Monomer concentration: 3.5 mmol; time: 120 min; initiator concentration 0.09 mol.] **(C)** Effect of initiator concentration [Other reaction conditions: 0.5 g of SA; Monomer concentration: 3.5 mmol; time: 120 min; temperature: 60 °C.] **(D)** Effect of reaction time. [Other reaction conditions: 0.5 g of SA; Monomer concentration: 3.5 mmol; initiator concentration 0.09 mol; temperature: 60 °C]

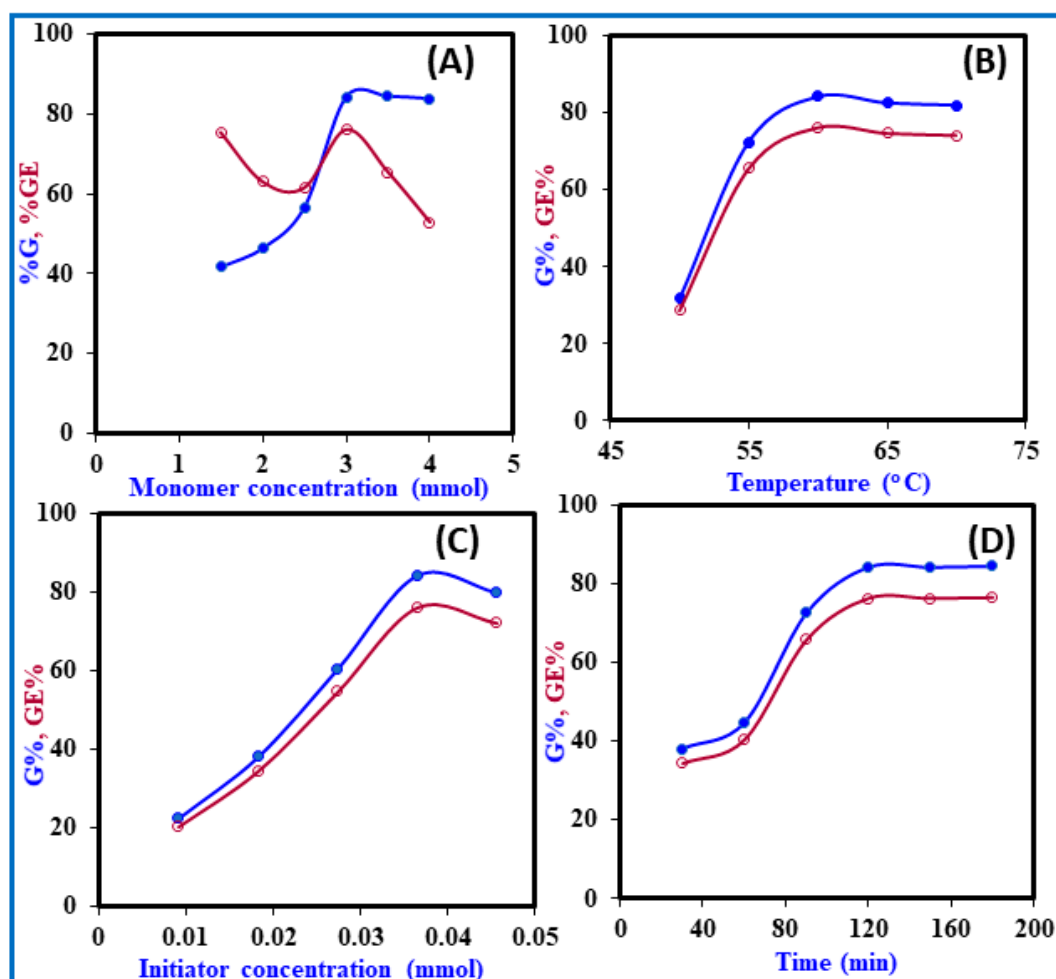

**Figure S6:** Effect of various reaction conditions on the grafting of SVBS onto the SA, prepared by CAN as initiator. **(A)** Effect of monomer (SVBS) concentration [Other reaction conditions: 0.5 g of SA; temperature: 60 °C; time: 120 min; initiator concentration 0.036 mmol.]. **(B)** Effect of reaction temperature [Other reaction conditions: 0.5 g of SA; Monomer concentration: 3.5 mmol; time: 120 min; initiator concentration 0.036 mmol.] **(C)** Effect of initiator concentration [Other reaction conditions: 0.5 g of SA; Monomer concentration: 3.5 mmol; time: 120 min; temperature: 60 °C.] **(D)** Effect of reaction time. [Other reaction conditions: 0.5 g of SA; Monomer concentration: 3.5 mmol; initiator concentration 0.036 mmol; temperature: 60 °C]

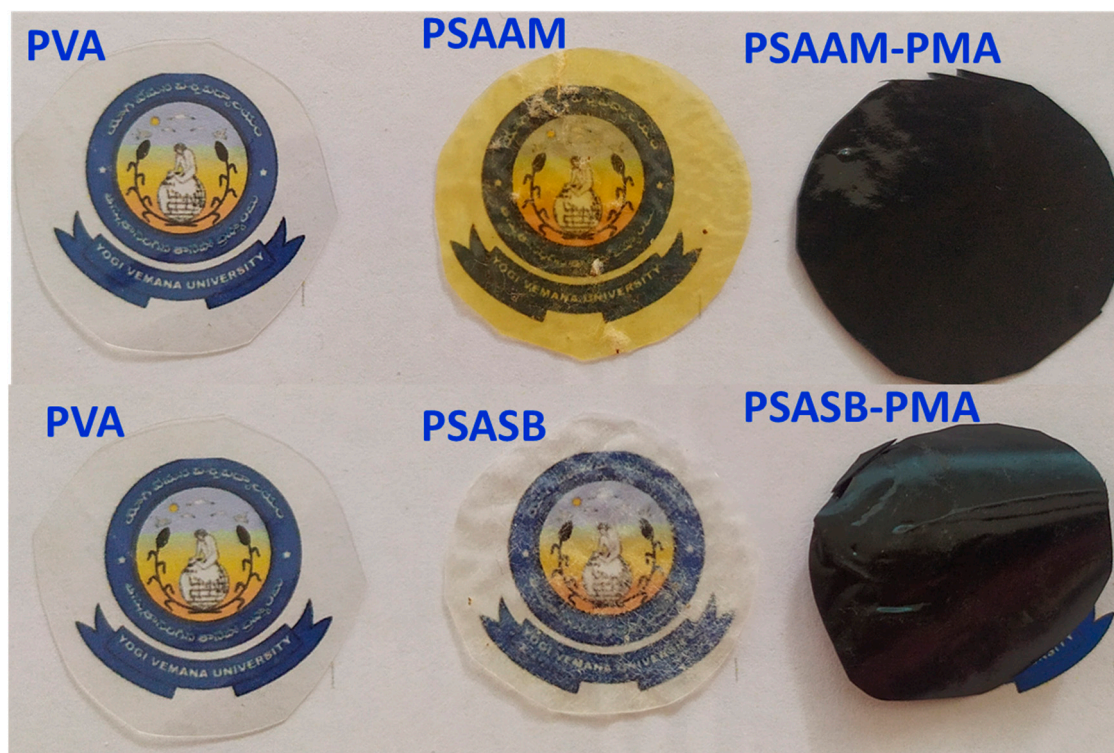

**Figure S7:** Digital photographs of various Sulfonated SA based PEMs.

**Table S1:** %Grafting, %grafting efficiency, %conversion, and %yield of PC-g-AMPS graft copolymer prepared by APS as initiator based on effect of various reaction conditions.

|                                  | %Grafting                                            | %Grafting Efficiency | %Conversion | %Yield |
|----------------------------------|------------------------------------------------------|----------------------|-------------|--------|
| <b>Temperature (°C)</b>          | <b>Effect of temperature on grafting</b>             |                      |             |        |
| 50                               | 18.60                                                | 12.82                | 81.76       | 48.40  |
| 55                               | 46.02                                                | 31.72                | 100.66      | 59.59  |
| 60                               | 61.86                                                | 42.64                | 111.58      | 66.05  |
| 65                               | 62.06                                                | 42.78                | 111.72      | 66.13  |
| 70                               | 42.02                                                | 28.97                | 97.90       | 57.95  |
| <b>Time (min)</b>                | <b>Effect of time on grafting</b>                    |                      |             |        |
| 30                               | 49.80                                                | 34.33                | 103.27      | 61.13  |
| 60                               | 53.52                                                | 36.90                | 105.83      | 62.65  |
| 90                               | 60.24                                                | 41.53                | 110.46      | 65.39  |
| 120                              | 62.06                                                | 42.78                | 111.72      | 66.13  |
| 150                              | 52.02                                                | 35.86                | 104.80      | 62.03  |
| <b>APS concentration (mmol)</b>  | <b>Effect of initiator concentration on grafting</b> |                      |             |        |
| 0.02                             | 18.46                                                | 12.73                | 81.66       | 48.34  |
| 0.04                             | 13.40                                                | 9.24                 | 78.17       | 46.27  |
| 0.06                             | 30.46                                                | 21.00                | 89.94       | 53.24  |
| 0.07                             | 44.16                                                | 30.44                | 99.38       | 58.83  |
| 0.09                             | 62.06                                                | 42.78                | 111.72      | 66.13  |
| 0.11                             | 58.40                                                | 40.26                | 109.20      | 64.64  |
| <b>AMPS concentration (mmol)</b> | <b>Effect of monomer concentration on grafting</b>   |                      |             |        |
| 1.5                              | 9.61                                                 | 15.46                | 176.29      | 67.59  |
| 2.0                              | 25.86                                                | 31.19                | 151.82      | 68.81  |
| 2.5                              | 37.80                                                | 36.48                | 132.98      | 67.67  |
| 3.0                              | 40.71                                                | 32.74                | 113.16      | 62.72  |
| 3.5                              | 62.02                                                | 42.75                | 111.68      | 66.11  |
| 4.0                              | 60.28                                                | 36.36                | 96.67       | 60.30  |

**Table S2:** %Grafting, %grafting efficiency, %conversion, and %yield of PC-g-SVBS graft copolymer prepared by CAN as initiator based on effect of various reaction conditions.

|                                  | %Grafting                                            | %Grafting Efficiency | %Conversion | %Yield |
|----------------------------------|------------------------------------------------------|----------------------|-------------|--------|
| <b>Temperature (°C)</b>          | <b>Effect of temperature on grafting</b>             |                      |             |        |
| 50                               | 31.86                                                | 28.83                | 119.30      | 62.63  |
| 55                               | 72.46                                                | 65.56                | 156.04      | 81.92  |
| 60                               | 84.22                                                | 76.20                | 166.68      | 87.50  |
| 65                               | 82.60                                                | 74.73                | 165.21      | 86.74  |
| 70                               | 82.02                                                | 74.21                | 164.69      | 86.46  |
| <b>Time (min)</b>                | <b>Effect of time on grafting</b>                    |                      |             |        |
| 30                               | 38.00                                                | 34.38                | 124.86      | 65.55  |
| 60                               | 44.72                                                | 40.46                | 130.94      | 68.74  |
| 90                               | 72.64                                                | 65.72                | 156.20      | 82.00  |
| 120                              | 84.22                                                | 76.20                | 166.68      | 87.50  |
| 150                              | 84.18                                                | 76.16                | 166.64      | 87.49  |
| 180                              | 84.00                                                | 76.00                | 166.48      | 87.40  |
| <b>CAN concentration (mmol)</b>  | <b>Effect of initiator concentration on grafting</b> |                      |             |        |
| 0.009                            | 22.46                                                | 20.32                | 110.80      | 58.17  |
| 0.018                            | 38.12                                                | 34.49                | 124.97      | 65.61  |
| 0.027                            | 60.46                                                | 54.70                | 145.18      | 76.22  |
| 0.036                            | 84.22                                                | 76.20                | 166.68      | 87.50  |
| 0.046                            | 79.86                                                | 72.25                | 162.73      | 85.43  |
| <b>SVBS concentration (mmol)</b> | <b>Effect of monomer concentration on grafting</b>   |                      |             |        |
| 1.5                              | 41.71                                                | 75.48                | 256.43      | 91.27  |
| 2.0                              | 46.42                                                | 63.00                | 198.71      | 84.30  |
| 2.5                              | 56.62                                                | 61.47                | 170.05      | 81.53  |
| 3.0                              | 84.22                                                | 76.20                | 166.68      | 87.50  |
| 3.5                              | 84.38                                                | 65.44                | 142.99      | 80.53  |
| 4.0                              | 83.78                                                | 56.80                | 124.65      | 74.26  |

**Table-S3: Various kinetics model for 5FU release studies.**

| Sample code | Zero order |       | First order |       | Higuchi |       | Hixson-Crowell |          | Korsmeyer |       |       |
|-------------|------------|-------|-------------|-------|---------|-------|----------------|----------|-----------|-------|-------|
|             | $R$        | $K_0$ | $R$         | $K_1$ | $R$     | $K_h$ | $R$            | $K_{hc}$ | pH-1.2    |       |       |
| PVA         | 0.85       | 5.12  | 0.723       | 4.03  | 0.823   | 1.75  | 0.731          | 3.35     | 0.943     | 8.21  | 5.32  |
| PSASB       | 0.954      | 0.681 | 0.989       | 1.35  | 0.991   | 0.58  | 0.995          | 1.44     | 0.995     | 2.22  | 0.309 |
| PSAAM       | 0.977      | 1.133 | 0.990       | 1.00  | 0.990   | 0.43  | 0.966          | 1.22     | 0.993     | 0.217 | 0.865 |
